# Supplementary material
Source: publisher site journal article supplement (https://www.dovepress.com/article/553311)

Supplementary Table 1 General Characteristics of All Patients in the Training and Validation Cohorts

|  | Total  (n = 1343) | Training cohorts  (n = 1074) | Validation cohorts  (n = 269) | p |
| --- | --- | --- | --- | --- |
| IPN, n (%) |  |  |  | 1.000 |
| No | 1232 (92) | 985 (92) | 247 (92) |  |
| Yes | 111 (8) | 89 (8) | 22 (8) |  |
| Sex, n (%) |  |  |  | 0.826 |
| Female | 489 (36) | 389 (36) | 100 (37) |  |
| Male | 854 (64) | 685 (64) | 169 (63) |  |
| Age, Median (Q1,Q3) | 47 (35, 61) | 47 (35, 62) | 47 (35, 60) | 0.921 |
| BMI, Median (Q1,Q3) | 25.71 (23.15, 28.88) | 25.65 (23.11, 29.07) | 26.12 (23.45, 28.72) | 0.361 |
| DM, n (%) |  |  |  | 0.146 |
| noDM | 1132 (84) | 897 (84) | 235 (87) |  |
| DM | 211 (16) | 177 (16) | 34 (13) |  |
| HTN, n (%) |  |  |  | 1.000 |
| No | 996 (74) | 796 (74) | 200 (74) |  |
| Yes | 347 (26) | 278 (26) | 69 (26) |  |
| HPL, n (%) |  |  |  | 0.300 |
| No | 1033 (77) | 833 (78) | 200 (74) |  |
| Yes | 310 (23) | 241 (22) | 69 (26) |  |
| SHG, n (%) |  |  |  | 0.513 |
| 'No stress hyperglycaemia' | 995 (74) | 791 (74) | 204 (76) |  |
| 'Stress hyperglycaemia' | 348 (26) | 283 (26) | 65 (24) |  |
| Fattyliver, n (%) |  |  |  | *0.019 |
| No | 1015 (76) | 827 (77) | 188 (70) |  |
| Yes | 328 (24) | 247 (23) | 81 (30) |  |
| SIRS, n (%) |  |  |  | 0.403 |
| No | 771 (57) | 610 (57) | 161 (60) |  |
| Yes | 572 (43) | 464 (43) | 108 (40) |  |
| MODS, n (%) |  |  |  | 0.269 |
| No | 982 (73) | 793 (74) | 189 (70) |  |
| Yes | 361 (27) | 281 (26) | 80 (30) |  |
| Peripancreatic Effusion, n (%) |  |  |  | 0.568 |
| No | 846 (63) | 672 (63) | 174 (65) |  |
| Yes | 497 (37) | 402 (37) | 95 (35) |  |
| Hydrothorax, n (%) |  |  |  | 0.158 |
| No | 882 (66) | 695 (65) | 187 (70) |  |
| Yes | 461 (34) | 379 (35) | 82 (30) |  |
| Seroperitoneum, n (%) |  |  |  | 0.682 |
| No | 897 (67) | 714 (66) | 183 (68) |  |
| Yes | 446 (33) | 360 (34) | 86 (32) |  |
| MCTSI, n (%) |  |  |  | 0.630 |
| 0 | 28 (2) | 23 (2) | 5 (2) |  |
| 2 | 572 (43) | 450 (42) | 122 (45) |  |
| 4 | 349 (26) | 274 (26) | 75 (28) |  |
| 6 | 315 (23) | 261 (24) | 54 (20) |  |
| 8 | 76 (6) | 63 (6) | 13 (5) |  |
| 10 | 3 (0) | 3 (0) | 0 (0) |  |
| BISAP, n (%) |  |  |  | 0.706 |
| 0 | 627 (47) | 493 (46) | 134 (50) |  |
| 1 | 528 (39) | 424 (39) | 104 (39) |  |
| 2 | 173 (13) | 144 (13) | 29 (11) |  |
| 3 | 13 (1) | 11 (1) | 2 (1) |  |
| 4 | 2 (0) | 2 (0) | 0 (0) |  |
| qSOFA, n (%) |  |  |  | 0.188 |
| 0 | 997 (74) | 784 (73) | 213 (79) |  |
| 1 | 306 (23) | 257 (24) | 49 (18) |  |
| 2 | 38 (3) | 31 (3) | 7 (3) |  |
| 3 | 2 (0) | 2 (0) | 0 (0) |  |
| OPNI, Median (Q1,Q3) | 42.05 (34.9, 48.17) | 42.05 (35.26, 48.05) | 42 (33.9, 49.55) | 0.695 |
| PLR, Median (Q1,Q3) | 174.6 (123.69, 256.67) | 178.44 (124.78, 257.94) | 164.79 (119.86, 238.88) | 0.161 |
| NLR, Median (Q1,Q3) | 7.58 (4.28, 13) | 7.86 (4.29, 13.41) | 6.96 (4.24, 11.5) | 0.023 |
| Bloodglucose, Median (Q1,Q3) | 8.39 (6.06, 11.4) | 8.5 (6.04, 11.4) | 8.09 (6.1, 11.04) | 0.241 |
| ALT, Median (Q1,Q3) | 39.9 (20.4, 119.9) | 40 (20.45, 120.88) | 38 (20, 110.9) | 0.528 |
| AST, Median (Q1,Q3) | 33.2 (21.6, 93.85) | 33.7 (21.92, 93.6) | 32 (20.3, 94.6) | 0.250 |
| Alb, Median (Q1,Q3) | 36.3 (30.1, 41.25) | 36.35 (30.5, 41.3) | 35.7 (28.7, 40.8) | 0.269 |
| Total bilirubin, Median (Q1,Q3) | 20.9 (12.05, 35.7) | 21.15 (12.4, 35.77) | 20.6 (10.4, 33.4) | 0.153 |
| Direct bilirubin, Median (Q1,Q3) | 6.5 (3.5, 14.6) | 6.4 (3.42, 14.3) | 7.7 (3.6, 16.9) | 0.306 |
| Total cholesterol, Median (Q1,Q3) | 4.03 (2.85, 5.29) | 4.03 (2.85, 5.22) | 4.07 (2.88, 5.53) | 0.745 |
| HDL-C, Median (Q1,Q3) | 1.21 (0.89, 1.53) | 1.2 (0.88, 1.48) | 1.28 (0.96, 1.8) | *0.007 |
| LDL-C, Median (Q1,Q3) | 2.57 (1.92, 3.86) | 2.54 (1.86, 3.7) | 2.68 (2.06, 27.5) | *0.001 |
| Urea, Median (Q1,Q3) | 5.1 (4, 6.6) | 5.1 (4, 6.7) | 4.8 (3.7, 6.1) | *0.007 |
| SCr, Median (Q1,Q3) | 73.1 (61.7, 87) | 73.5 (62.35, 87.07) | 71.9 (60.4, 87) | 0.332 |
| AMY, Median (Q1,Q3) | 188.8 (75.55, 618.65) | 207.45 (80.25, 679.28) | 149.9 (64.5, 448.5) | *0.001 |
| LPS, Median (Q1,Q3) | 238.6 (85.65, 758.1) | 254.4 (89.9, 792.62) | 181.4 (71.2, 598.9) | *0.014 |
| K, Median (Q1,Q3) | 3.93 (3.64, 4.22) | 3.95 (3.66, 4.24) | 3.87 (3.61, 4.16) | *0.018 |
| Na, Median (Q1,Q3) | 136.6 (134.3, 138.8) | 136.6 (134.3, 138.8) | 136.9 (134.4, 138.8) | 0.384 |
| Cl, Median (Q1,Q3) | 102.8 (99.8, 105.4) | 102.8 (99.9, 105.3) | 102.8 (99.5, 105.7) | 0.977 |
| P, Median (Q1,Q3) | 0.98 (0.73, 1.18) | 0.98 (0.74, 1.18) | 0.95 (0.72, 1.15) | 0.376 |
| Mg, Median (Q1,Q3) | 0.82 (0.75, 0.89) | 0.82 (0.75, 0.89) | 0.82 (0.76, 0.89) | 0.525 |
| Ca, Median (Q1,Q3) | 2.17 (2.04, 2.27) | 2.17 (2.03, 2.27) | 2.18 (2.08, 2.3) | 0.140 |
| PT-S, Median (Q1,Q3) | 12.5 (11.8, 13.6) | 12.6 (11.9, 13.6) | 12.5 (11.8, 13.4) | 0.166 |
| PT(%), Median (Q1,Q3) | 81 (71, 88.5) | 80 (71, 88) | 82 (73, 90) | *0.032 |
| APTT, Median (Q1,Q3) | 29.9 (28, 32.3) | 29.9 (28, 32.4) | 29.9 (27.8, 32) | 0.665 |
| TT, Median (Q1,Q3) | 13.8 (12.7, 14.8) | 13.8 (12.7, 14.8) | 13.8 (12.6, 14.8) | 0.769 |
| D-Dimer, Median (Q1,Q3) | 497 (228.5, 1064.5) | 518 (229.75, 1070.5) | 425 (228, 1024) | 0.241 |
| WBC, Median (Q1,Q3) | 10.9 (7.6, 14.4) | 11 (7.7, 14.5) | 10.87 (7.3, 14.1) | 0.405 |
| NEUT, Median (Q1,Q3) | 9.02 (5.72, 12.14) | 9.07 (5.74, 12.29) | 8.52 (5.64, 11.7) | 0.279 |
| LYMPH, Median (Q1,Q3) | 1.15 (0.78, 1.61) | 1.12 (0.76, 1.6) | 1.22 (0.87, 1.65) | *0.030 |
| MONO, Median (Q1,Q3) | 0.59 (0.4, 0.83) | 0.59 (0.4, 0.83) | 0.58 (0.37, 0.8) | 0.702 |
| RBC, Median (Q1,Q3) | 4.55 (4.08, 5.01) | 4.55 (4.08, 5.03) | 4.56 (4.07, 4.99) | 0.945 |
| HGB, Median (Q1,Q3) | 135 (110, 155) | 134 (108.93, 154) | 139 (116, 157) | 0.326 |
| HCT, Median (Q1,Q3) | 0.46 (0.4, 19) | 0.46 (0.4, 19.35) | 0.46 (0.4, 15.3) | 0.848 |
| MCV, Median (Q1,Q3) | 91.9 (88.9, 95.52) | 92 (89, 95.8) | 91.42 (88.3, 94.9) | 0.058 |
| MCH, Median (Q1,Q3) | 31.2 (30, 32.4) | 31.3 (30.02, 32.4) | 31.1 (29.9, 32.2) | 0.273 |
| MCHC, Median (Q1,Q3) | 338 (332, 344) | 338 (332, 344) | 338 (333, 344) | 0.399 |
| RDW, Median (Q1,Q3) | 13.3 (12.4, 14.1) | 13.3 (12.4, 14.1) | 13.2 (12.5, 14.1) | 0.647 |
| PCT, Median (Q1,Q3) | 0.18 (0.15, 0.22) | 0.18 (0.14, 0.22) | 0.18 (0.15, 0.22) | *0.086 |
| PLT, Median (Q1,Q3) | 203 (160.5, 254) | 203 (158, 253) | 206 (165, 260) | 0.244 |
| PDW, Median (Q1,Q3) | 16.8 (16.2, 17.4) | 16.77 (16.2, 17.4) | 16.8 (16.3, 17.4) | 0.347 |
| MPV, Median (Q1,Q3) | 8.6 (7.9, 9.5) | 8.6 (7.9, 9.5) | 8.6 (8, 9.4) | 0.646 |

Notes: Value are presented as number (%), mean±standard deviation or IQR, 50 (25, 75). Normally distributed data were tested using independent samples t-tests, and nonparametric tests were used for nonnormal data. *Statistically significant p-values (p < 0.05) are indicated in bold.

Supplementary table 2.Comparison of General Characteristics of Study Populations Stratified by Infectious Necrosis

|  | Total  (n = 1343) | Non-IPN  (n = 1232) | IPN  (n = 111) | p |
| --- | --- | --- | --- | --- |
| Sex, n (%) |  |  |  | 0.85 |
| Female | 489 (36) | 450 (37) | 39 (35) |  |
| Male | 854 (64) | 782 (63) | 72 (65) |  |
| Age, Median (Q1,Q3) | 47 (35, 61) | 47 (35, 61) | 49 (37, 62) | 0.231 |
| BMI, Median (Q1,Q3) | 25.71 (23.15, 28.88) | 25.68 (23.15, 28.72) | 26.56 (23.08, 30.06) | 0.086 |
| AP etiology, n (%) |  |  |  | 0.055 |
| Biliary | 622 (46) | 560 (45) | 62 (56) |  |
| Hypertriglyceridemia | 160 (12) | 154 (12) | 6 (5) |  |
| Alcoholic | 164 (12) | 149 (12) | 15 (14) |  |
| Others | 397 (30) | 369 (30) | 28 (25) |  |
| Others, n (%) |  |  |  | 0.54 |
| No | 551 (41) | 509 (41) | 42 (38) |  |
| Yes | 792 (59) | 723 (59) | 69 (62) |  |
| Smoking, n (%) |  |  |  | 0.676 |
| No | 816 (61) | 746 (61) | 70 (63) |  |
| Yes | 527 (39) | 486 (39) | 41 (37) |  |
| Drinking, n (%) |  |  |  | 0.706 |
| No | 855 (64) | 782 (63) | 73 (66) |  |
| Yes | 488 (36) | 450 (37) | 38 (34) |  |
| DM, n (%) |  |  |  | 0.773 |
| noDM | 1132 (84) | 1040 (84) | 92 (83) |  |
| DM | 211 (16) | 192 (16) | 19 (17) |  |
| HTN, n (%) |  |  |  | 0.275 |
| No | 996 (74) | 919 (75) | 77 (69) |  |
| Yes | 347 (26) | 313 (25) | 34 (31) |  |
| HPL, n (%) |  |  |  | 0.056 |
| No | 1033 (77) | 939 (76) | 94 (85) |  |
| Yes | 310 (23) | 293 (24) | 17 (15) |  |
| Fattyliver, n (%) |  |  |  | 0.079 |
| No | 1015 (76) | 923 (75) | 92 (83) |  |
| Yes | 328 (24) | 309 (25) | 19 (17) |  |
| Hospitalization days, Median (Q1,Q3) | 13 (9, 18) | 12 (9, 17) | 20 (13, 38) | <0.001* |
| Infection, n (%) |  |  |  | < 0.001* |
| No | 1269 (94) | 1190 (97) | 79 (71) |  |
| Yes | 74 (6) | 42 (3) | 32 (29) |  |
| Severity of pancreatitis, n (%) |  |  |  | < 0.001* |
| Mild | 821 (61) | 815 (66) | 6 (5) |  |
| 'Moderate or severe' | 522 (39) | 417 (34) | 105 (95) |  |
| SIRS, n (%) |  |  |  | < 0.001* |
| No | 771 (57) | 751 (61) | 20 (18) |  |
| Yes | 572 (43) | 481 (39) | 91 (82) |  |
| MODS, n (%) |  |  |  | < 0.001* |
| No | 982 (73) | 937 (76) | 45 (41) |  |
| Yes | 361 (27) | 295 (24) | 66 (59) |  |
| Peripancreatic Effusion, n (%) |  |  |  | < 0.001* |
| No | 846 (63) | 840 (68) | 6 (5) |  |
| Yes | 497 (37) | 392 (32) | 105 (95) |  |
| pleural effusion, n (%) |  |  |  | < 0.001* |
| No | 882 (66) | 852 (69) | 30 (27) |  |
| Yes | 461 (34) | 380 (31) | 81 (73) |  |
| Seroperitoneum, n (%) |  |  |  | < 0.001* |
| No | 897 (67) | 859 (70) | 38 (34) |  |
| Yes | 446 (33) | 373 (30) | 73 (66) |  |
| Surgical Intervention, n (%) |  |  |  | < 0.001* |
| No | 1068 (80) | 994 (81) | 74 (67) |  |
| Yes | 275 (20) | 238 (19) | 37 (33) |  |
| Thoracocentesis, n (%) |  |  |  | < 0.001* |
| No | 1313 (98) | 1217 (99) | 96 (86) |  |
| Yes | 30 (2) | 15 (1) | 15 (14) |  |
| Abdominocentesis, n (%) |  |  |  | < 0.001* |
| No | 1266 (94) | 1195 (97) | 71 (64) |  |
| Yes | 77 (6) | 37 (3) | 40 (36) |  |
| Operative Treatment, n (%) |  |  |  | < 0.001* |
| Peripancreatic debridement | 37 (3) | 9 (1) | 28 (25) |  |
| LC | 188 (14) | 181 (15) | 7 (6) |  |
| ERCP | 16 (1) | 14 (1) | 2 (2) |  |
| Bile duct exploration | 34 (3) | 34 (3) | 0 (0) |  |
| No | 1068 (80) | 994 (81) | 74 (67) |  |
| Enteral Nutrition, n (%) |  |  |  | < 0.001* |
| No | 1146 (85) | 1078 (88) | 68 (61) |  |
| Yes | 197 (15) | 154 (12) | 43 (39) |  |
| ICU admission, n (%) |  |  |  | < 0.001* |
| No | 1301 (97) | 1205 (98) | 96 (86) |  |
| Yes | 42 (3) | 27 (2) | 15 (14) |  |
| Mortality, n (%) |  |  |  | < 0.001* |
| No | 1318 (98) | 1216 (99) | 102 (92) |  |
| Yes | 25 (2) | 16 (1) | 9 (8) |  |
| MCTSI, n (%) |  |  |  | < 0.001* |
| 0 | 28 (2) | 26 (2) | 2 (2) |  |
| 2 | 572 (43) | 554 (45) | 18 (16) |  |
| 4 | 349 (26) | 336 (27) | 13 (12) |  |
| 6 | 315 (23) | 287 (23) | 28 (25) |  |
| 8 | 76 (6) | 28 (2) | 48 (43) |  |
| 10 | 3 (0) | 1 (0) | 2 (2) |  |
| BISAP, n (%) |  |  |  | < 0.001* |
| 0 | 627 (47) | 609 (49) | 18 (16) |  |
| 1 | 528 (39) | 467 (38) | 61 (55) |  |
| 2 | 173 (13) | 147 (12) | 26 (23) |  |
| 3 | 13 (1) | 7 (1) | 6 (5) |  |
| 4 | 2 (0) | 2 (0) | 0 (0) |  |
| qSOFA, n (%) |  |  |  | < 0.001* |
| 0 | 997 (74) | 935 (76) | 62 (56) |  |
| 1 | 306 (23) | 270 (22) | 36 (32) |  |
| 2 | 38 (3) | 26 (2) | 12 (11) |  |
| 3 | 2 (0) | 1 (0) | 1 (1) |  |
| OPNI, Median (Q1,Q3) | 42.05 (34.9, 48.17) | 42.62 (35.75, 48.5) | 34.55 (30, 41.75) | < 0.001* |
| PLR, Median (Q1,Q3) | 174.6 (123.69, 256.67) | 171.9 (121.8, 250.22) | 208.11 (149.45, 323.03) | < 0.001* |
| NLR, Median (Q1,Q3) | 7.58 (4.28, 13) | 7.38 (4.1, 12.35) | 11.87 (6.81, 17.59) | < 0.001* |
| SHG, n (%) |  |  |  | < 0.001* |
| 'No stress hyperglycaemia' | 995 (74) | 935 (76) | 60 (54) |  |
| 'Stress hyperglycaemia' | 348 (26) | 297 (24) | 51 (46) |  |
| Bloodglucose, Median (Q1,Q3) | 8.39 (6.06, 11.4) | 8.2 (6, 11.05) | 10.6 (7.55, 14.51) | < 0.001* |
| ALT, Median (Q1,Q3) | 39.9 (20.4, 119.9) | 39.85 (20.38, 119.93) | 41.2 (20.85, 110.15) | 0.882 |
| AST, Median (Q1,Q3) | 33.2 (21.6, 93.85) | 32.65 (21.28, 93.6) | 42.9 (24.8, 104.95) | 0.075 |
| Alb, Median (Q1,Q3) | 36.3 (30.1, 41.25) | 36.65 (31, 41.5) | 29.9 (25.55, 36.25) | < 0.001* |
| Total bilirubin, Median (Q1,Q3) | 20.9 (12.05, 35.7) | 21.1 (12.4, 35.92) | 19.5 (9.75, 29.2) | 0.103 |
| Direct bilirubin, Median (Q1,Q3) | 6.5 (3.5, 14.6) | 6.2 (3.4, 14.3) | 9.4 (4.7, 19.1) | 0.002* |
| Total cholesterol, Median (Q1,Q3) | 4.03 (2.85, 5.29) | 4.08 (2.93, 5.3) | 3.37 (2.01, 5.08) | 0.005* |
| Triglyceride, Median (Q1,Q3) | 1.13 (0.77, 2.21) | 1.13 (0.77, 2.22) | 1.04 (0.8, 1.84) | 0.966 |
| HDL-C, Median (Q1,Q3) | 1.21 (0.89, 1.53) | 1.22 (0.91, 1.52) | 1.15 (0.69, 1.69) | 0.088 |
| LDL-C, Median (Q1,Q3) | 2.57 (1.92, 3.86) | 2.55 (1.93, 3.75) | 2.83 (1.85, 27.9) | 0.204 |
| Urea, Median (Q1,Q3) | 5.1 (4, 6.6) | 5 (4, 6.4) | 6.2 (4.6, 10.3) | < 0.001* |
| SCr, Median (Q1,Q3) | 73.1 (61.7, 87) | 72.8 (61.6, 86.1) | 81.1 (65.05, 109.6) | < 0.001* |
| AMY, Median (Q1,Q3) | 188.8 (75.55, 618.65) | 185 (73.75, 598.25) | 275 (102.15, 811.4) | 0.06 |
| LPS, Median (Q1,Q3) | 238.6 (85.65, 758.1) | 230.95 (85.6, 758.25) | 318.8 (96.15, 731.2) | 0.444 |
| K, Median (Q1,Q3) | 3.93 (3.64, 4.22) | 3.92 (3.64, 4.21) | 4.04 (3.72, 4.33) | 0.034* |
| Na, Median (Q1,Q3) | 136.6 (134.3, 138.8) | 136.7 (134.4, 138.8) | 135.7 (132.9, 138.8) | 0.067 |
| Cl, Median (Q1,Q3) | 102.8 (99.8, 105.4) | 102.9 (99.9, 105.4) | 101.4 (98.45, 105.75) | 0.15 |
| P, Median (Q1,Q3) | 0.98 (0.73, 1.18) | 0.98 (0.75, 1.18) | 0.9 (0.51, 1.15) | 0.015* |
| Mg, Median (Q1,Q3) | 0.82 (0.75, 0.89) | 0.82 (0.75, 0.89) | 0.82 (0.74, 0.9) | 0.93 |
| Ca, Median (Q1,Q3) | 2.17 (2.04, 2.27) | 2.18 (2.06, 2.28) | 2.01 (1.89, 2.16) | < 0.001* |
| PT-S, Median (Q1,Q3) | 12.5 (11.8, 13.6) | 12.5 (11.8, 13.5) | 13.6 (12.4, 14.75) | < 0.001* |
| PT(%), Median (Q1,Q3) | 81 (71, 88.5) | 81 (72, 89) | 72 (64, 83) | < 0.001* |
| APTT, Median (Q1,Q3) | 29.9 (28, 32.3) | 29.9 (28, 32.3) | 30.2 (27.4, 32.6) | 0.999 |
| TT, Median (Q1,Q3) | 13.8 (12.7, 14.8) | 13.8 (12.7, 14.8) | 13.9 (12.75, 14.9) | 0.195 |
| FIB-C, Median (Q1,Q3) | 3.93 (3.16, 5.14) | 3.91 (3.14, 4.98) | 4.49 (3.39, 5.89) | 0.034* |
| D-Dimer, Median (Q1,Q3) | 497 (228.5, 1064.5) | 452 (215, 982) | 1260 (626.5, 2172.5) | < 0.001* |
| WBC, Median (Q1,Q3) | 10.9 (7.6, 14.4) | 10.8 (7.5, 14.1) | 12.9 (9.4, 17.05) | < 0.001* |
| NEUT, Median (Q1,Q3) | 9.02 (5.72, 12.14) | 8.75 (5.6, 11.93) | 10.29 (7.4, 14.7) | < 0.001* |
| LYMPH, Median (Q1,Q3) | 1.15 (0.78, 1.61) | 1.17 (0.8, 1.64) | 0.98 (0.7, 1.27) | < 0.001* |
| MONO, Median (Q1,Q3) | 0.59 (0.4, 0.83) | 0.58 (0.39, 0.81) | 0.66 (0.46, 1.02) | 0.02* |
| RBC, Median (Q1,Q3) | 4.55 (4.08, 5.01) | 4.55 (4.09, 5.01) | 4.48 (3.92, 5.08) | 0.522 |
| HGB, Median (Q1,Q3) | 135 (110, 155) | 135 (110.75, 154) | 138.5 (104, 160.5) | 0.425 |
| HCT, Median (Q1,Q3) | 0.46 (0.4, 19) | 0.45 (0.4, 17.7) | 0.47 (0.41, 34.4) | 0.226 |
| MCV, Median (Q1,Q3) | 91.9 (88.9, 95.52) | 91.9 (88.9, 95.5) | 92.5 (88.35, 97.03) | 0.501 |
| MCH, Median (Q1,Q3) | 31.2 (30, 32.4) | 31.2 (30, 32.4) | 31.3 (29.8, 32.9) | 0.907 |
| MCHC, Median (Q1,Q3) | 338 (332, 344) | 338 (332, 344) | 336 (331, 343) | 0.097 |
| RDW, Median (Q1,Q3) | 13.3 (12.4, 14.1) | 13.2 (12.3, 14.1) | 13.8 (13.1, 14.5) | < 0.001* |
| PCT, Median (Q1,Q3) | 0.18 (0.15, 0.22) | 0.18 (0.15, 0.22) | 0.18 (0.14, 0.23) | 0.513 |
| PLT, Median (Q1,Q3) | 203 (160.5, 254) | 203 (161, 254) | 198 (156.5, 269.5) | 0.987 |
| PDW, Median (Q1,Q3) | 16.8 (16.2, 17.4) | 16.76 (16.2, 17.4) | 17 (16.5, 17.6) | 0.003* |
| MPV, Median (Q1,Q3) | 8.6 (7.9, 9.5) | 8.6 (7.9, 9.5) | 8.8 (8.15, 9.85) | 0.043* |

Notes: Value are presented as number (%), mean±standard deviation or IQR, 50 (25, 75). Normally distributed data were tested using independent samples t-tests, and nonparametric tests were used for nonnormal data. *Statistically significant p-values (p < 0.05) are indicated in bold.


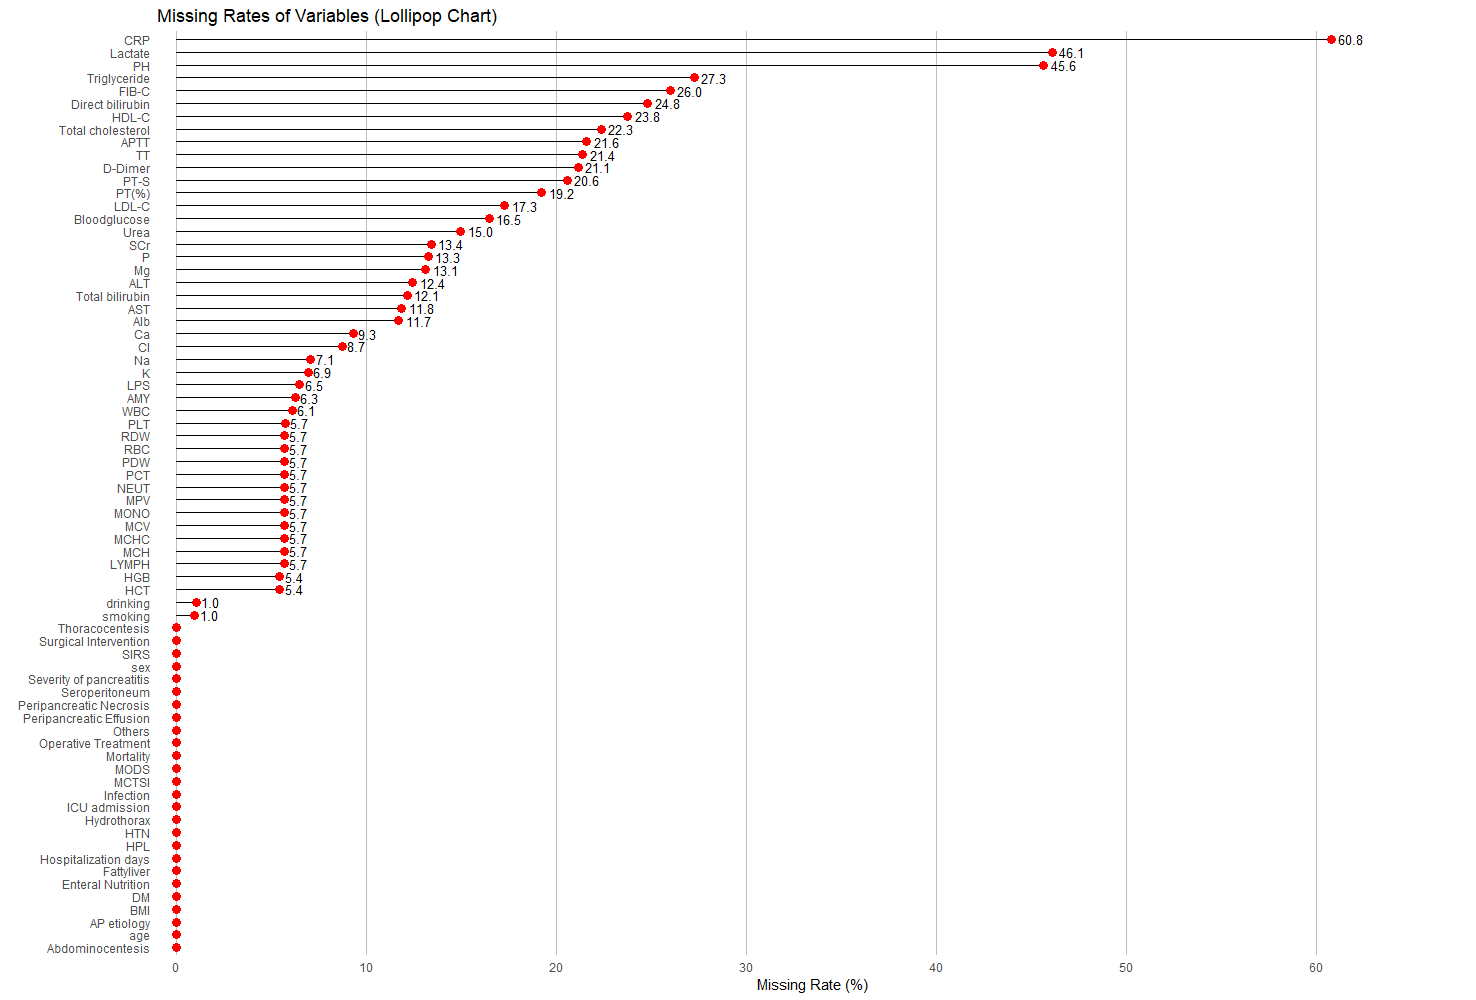


Supplementary Figure 1. Lollipop chart illustrating the missing rates of variables in the study cohort. Each lollipop corresponds to one variable, where the horizontal line represents the range and the red dot indicates the respective missing rate (%).


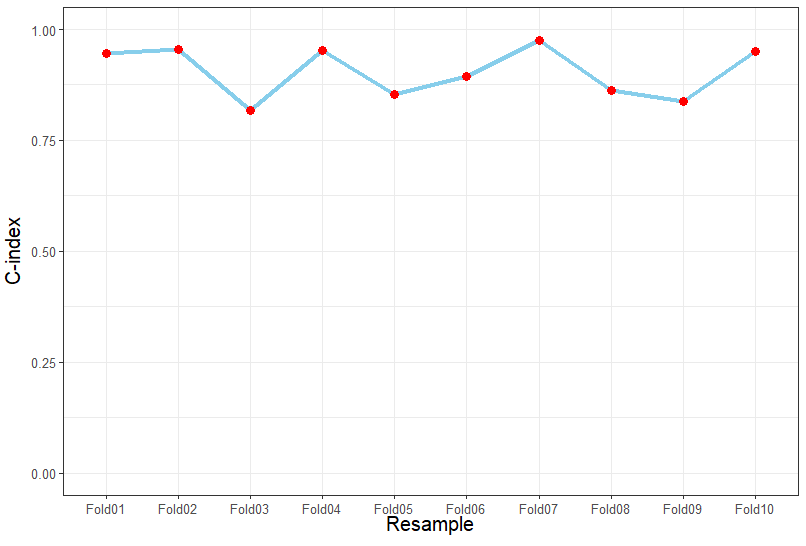


A

B

Supplementary Figure 2. (A) Distribution of C-index values from 1000-iteration Bootstrap internal validation in the training cohort. The C-index (concordance index) measures the model's probability of correctly predicting event timing, where C=0.5 indicates random guessing and C=1 denotes perfect prediction. (B) Distribution of C-index values from 10-fold cross-validation internal validation in the training cohort.


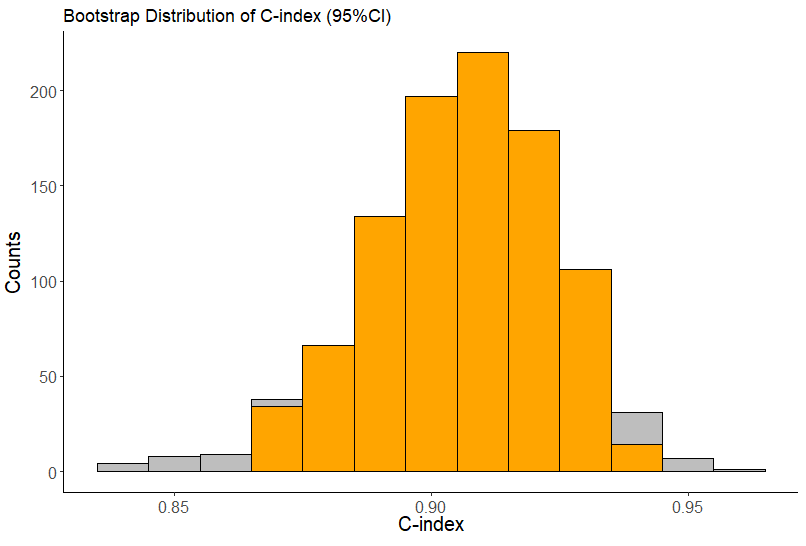

Supplement: Supplementary file 1 [file 553311%20Supplementary%20Materials_1.docx]
